# Supplementary material
Source: PubMed Central journal article supplement (PMC11028038)
Supplement: 262_2017_2066_MOESM1_ESM.pdf [file 262_2017_2066_MOESM1_ESM.pdf]

## SUPPLEMENTARY TABLES 1-5

**Supplementary Table 1:** List of antigens used for the Whole Blood Assay (WBA)

| <b>Antigen</b>          | <b>Type</b> | <b>Final concentration</b> | <b>Access NO.</b>         |
|-------------------------|-------------|----------------------------|---------------------------|
| PHA                     | protein     | 5µg/ml                     | L901710MG                 |
| CD3 Ab                  | protein     | 30ng/ml                    | Clone:OKT3                |
| SEA+SEB                 | protein     | 10ng/ml                    | SEA:Sigma#9399 SEB:S-4481 |
| EBNA-1                  | protein     | 1µg/ml                     | P03211 (swiss prot)       |
| EBNA-3a                 | protein     | 1µg/ml                     | P12977 (swiss prot)       |
| A-VIET(H5N1)            | protein     | 2.5µg/ml                   | Baxter (HA protein)       |
| H1N1 California         | protein     | 2.5µg/ml                   | GSK split                 |
| ESAT-6                  | protein     | 1µg/ml                     | AEP68523                  |
| CMV-pp65                | protein     | 1µg/ml                     | P06725 (swiss prot)       |
| EGFRvIII                | peptide     | 1µg/ml                     | LEEKKGNYVVTDH             |
| NY-ESO-1                | peptide mix | 1/peptide/ml               | P78358 (swiss prot)       |
| NY-ESO-1 80-94          | peptide     | 1µg/ml                     | ARGPESRLLEFYLAM-NH2       |
| NY-ESO-1 89-103         | peptide     | 1µg/ml                     | H- EFYLAMPFATPMEAE- NH2   |
| NY-ESO-1 157-171        | peptide     | 1µg/ml                     | SLLMWITQCFLPVFL-NH2       |
| survivin single peptide | peptide     | 1µg/ml                     | TLGEFLKLDREERAKN          |
| survivin peptide mix    | peptide mix | 1/peptide/ml               | Q5RAH9 (swiss prot)       |

**Supplementary Table 2:** Details of the immunohistochemistry staining results for NY-ESO-1 and survivin (n.d. = not determined).

| <b>Study ID</b> | <b>Diagnosis / Grade</b> | <b>Survivin-score</b> | <b>Immunohistochemistry Staining NY-ESO-1</b> |
|-----------------|--------------------------|-----------------------|-----------------------------------------------|
| GBM 1           | GBM / IV                 | 2+                    | Focal                                         |
| GBM 2           | GBM / IV                 | 3+                    | 2+                                            |
| GBM 4           | GBM / IV                 | 3+                    | Focal                                         |
| GBM 5           | GBM / IV                 | 2+                    | Neg                                           |
| GBM 6           | GBM / IV                 | 4+                    | Focal                                         |
| GBM 7           | Astro / II               | 2+                    | Focal                                         |
| GBM 8           | Astro / III              | 1+                    | 2+                                            |
| GBM 9           | Oligo / II               | 1+                    | 1+                                            |
| GBM 10          | GBM / IV                 | 2+                    | 1+                                            |
| GBM 12          | GBM / IV                 | 3+                    | 1+                                            |
| GBM 13          | GBM / IV                 | 1+                    | n.d.                                          |
| GBM 14          | Astro / III              | 1+                    | n.d.                                          |
| GBM 15          | Astro / II               | 1+                    | 3+                                            |
| GBM 16          | Astro / II               | 1+                    | 1+                                            |
| GBM 17          | Astro / II               | 2+                    | Neg                                           |
| GBM 18          | GBM / IV                 | 4+                    | 1+                                            |
| GBM 19          | GBM / IV                 | 3+                    | Focal                                         |
| GBM 20          | GBM / IV                 | 4+                    | Neg                                           |
| GBM 21          | OA / II                  | 2+                    | 1+                                            |
| GBM 22          | Oligo / III              | 2+                    | Neg                                           |
| GBM 23          | GBM / IV                 | 4+                    | 1+                                            |
| GBM 24          | GBM / IV                 | 1+                    | 1+                                            |
| GBM 25          | GBM / IV                 | 2+                    | Focal                                         |
| GBM 26          | GBM / IV                 | 2+                    | Focal                                         |
| GBM 27          | OA / III                 | 3+                    | Focal                                         |
| GBM 28          | OA / III                 | 2+                    | 4+                                            |
| GBM 29          | GBM / IV                 | 3+                    | Focal                                         |
| GBM 30          | GBM / IV                 | 4+                    | Focal                                         |
| GBM 31          | GBM / IV                 | 3+                    | 4+                                            |
| GBM 32          | GBM / IV                 | 4+                    | Focal                                         |
| GBM 33          | GBM / IV                 | 3+                    | Neg                                           |
| GBM 35          | Astro / II               | 1+                    | Focal                                         |
| GBM 36          | GBM / IV                 | 4+                    | Neg                                           |
| GBM 37          | GBM / IV                 | 4+                    | Neg                                           |
| GBM 38          | Oligo / III              | 3+                    | Neg                                           |
| GBM 39          | GBM / IV                 | 4+                    | Neg                                           |
| GBM 40          | GBM / IV                 | 3+                    | Focal                                         |
| GBM 41          | Astro / II               | 1+                    | 1+                                            |
| GBM 42          | GBM / IV                 | 1+                    | 2+                                            |
| GBM 43          | GBM / IV                 | 3+                    | Neg                                           |

**Supplementary Table 3: Antigen-driven expression of activation markers in PBMCs from patients with GBM**

| <i>Activation marker</i> |                 | <b>GBM 30</b> |           | <b>GBM 31</b> |           | <b>GBM 33</b> |           | <b>GBM 34</b> |           | <b>GBM 35</b> |           |
|--------------------------|-----------------|---------------|-----------|---------------|-----------|---------------|-----------|---------------|-----------|---------------|-----------|
|                          | Ag stimulation  | <i>T0</i>     | <b>Ag</b> | <i>T0</i>     | <b>Ag</b> | <i>T0</i>     | <b>Ag</b> | <i>T0</i>     | <b>Ag</b> | <i>T0</i>     | <b>Ag</b> |
| <b>CD4+</b>              | <b>EGFRVIII</b> |               | 12,2      |               | 39        |               | 10,9      |               | 44,3      |               | 74,4      |
|                          | <b>CD4+</b>     |               | 40,4      |               | 70        |               | 36,2      |               | 48,8      |               | 65,6      |
|                          | <b>NY-ESO-1</b> |               | 30,5      |               | 62,5      |               | 30,6      |               | 63,1      |               | 74,8      |
|                          | <b>Survivin</b> |               | 24,8      |               | 70,5      |               | 33,5      |               | 63,7      |               | 72,2      |
|                          | <b>EGFRVIII</b> |               | 1,39      |               | 1,85      |               | 0,39      |               | 0,91      |               | 1,47      |
|                          | <b>4-1BB+</b>   |               | 0,13      |               | 0,16      |               | 0,032     |               | 0,28      |               | 0,083     |
|                          | <b>NY-ESO-1</b> |               | 26,5      |               | 50,2      |               | 16,9      |               | 3,47      |               | 2,78      |
|                          | <b>Survivin</b> |               | 34,2      |               | 43,4      |               | 14,6      |               | 11,9      |               | 4,02      |
|                          | <b>EGFRVIII</b> |               | 31,8      |               | 50,6      |               | 12        |               | 84,3      |               | 86,9      |
|                          | <b>CD25+</b>    |               | 2,76      |               | 6,43      |               | 4,01      |               | 10,1      |               | 4,73      |
| <b>NY-ESO-1</b>          |                 | 66            |           | 85,7          |           | 29,6          |           | 60,5          |           | 97,5          |           |
| <b>Survivin</b>          |                 | 56,4          |           | 88,2          |           | 30,6          |           | 76            |           | 94,2          |           |
| <b>EGFRVIII</b>          |                 | 77,5          |           | 34,7          |           | 84,9          |           | 16,4          |           | 8,08          |           |
| <b>CD127+</b>            |                 | 77,6          |           | 69,5          |           | 88,5          |           | 35,7          |           | 42            |           |
| <b>NY-ESO-1</b>          |                 | 60,4          |           | 49            |           | 64,3          |           | 34,3          |           | 2,08          |           |
| <b>Survivin</b>          |                 | 55,8          |           | 54            |           | 71,5          |           | 35,8          |           | 6,77          |           |
| <b>EGFRVIII</b>          |                 | 0,88          |           | 1,79          |           | 0,44          |           | 1,19          |           | 3,82          |           |
| <b>CTLA-4+</b>           |                 | 0,27          |           | 1,04          |           | 0,19          |           | 1,64          |           | 1,28          |           |
| <b>NY-ESO-1</b>          |                 | 6,87          |           | 7,59          |           | 0,93          |           | 3,03          |           | 3,66          |           |
| <b>Survivin</b>          |                 | 4,91          |           | 7,43          |           | 1,46          |           | 7,28          |           | 7,04          |           |
| <b>EGFRVIII</b>          |                 | 7,71          |           | 10,1          |           | 4,68          |           | 2,73          |           | 3,06          |           |
| <b>LAG3+</b>             |                 | 10,7          |           | 12,5          |           | 4,05          |           | 3,66          |           | 2,21          |           |
| <b>NY-ESO-1</b>          |                 | 20,8          |           | 26,3          |           | 10,8          |           | 4,65          |           | 2,58          |           |
| <b>Survivin</b>          |                 | 20,5          |           | 17            |           | 13,9          |           | 5,98          |           | 3,79          |           |
| <b>EGFRVIII</b>          |                 | 21,9          |           | 34,2          |           | 9,13          |           | 29,3          |           | 84,5          |           |
| <b>PD-1</b>              |                 | 7,1           |           | 37,8          |           | 14,8          |           | 3,99          |           | 4,64          |           |
| <b>NY-ESO-1</b>          |                 | 55,8          |           | 50,2          |           | 15,1          |           | 39,4          |           | 87,2          |           |
| <b>Survivin</b>          |                 | 47,1          |           | 55,4          |           | 17,2          |           | 55,8          |           | 90,5          |           |
| <b>EGFRVIII</b>          |                 | 0,066         |           | 0,056         |           | 0,016         |           | 0,35          |           | 0,75          |           |
| <b>TIM3+</b>             |                 | 0             |           | 0             |           | 0,063         |           | 0,52          |           | 0,044         |           |
| <b>NY-ESO-1</b>          |                 | 0,34          |           | 0,36          |           | 0,5           |           | 1,71          |           | 0,21          |           |
| <b>Survivin</b>          |                 | 0,28          |           | 0,27          |           |               |           |               |           |               |           |

| <i>Activation marker</i> |                 | <b>GBM 30</b>   |           | <b>GBM 31</b> |           | <b>GBM 33</b> |           | <b>GBM 34</b> |           | <b>GBM 35</b> |           |      |
|--------------------------|-----------------|-----------------|-----------|---------------|-----------|---------------|-----------|---------------|-----------|---------------|-----------|------|
|                          | Ag stimulation  | <i>T0</i>       | <i>Ag</i> | <i>T0</i>     | <i>Ag</i> | <i>T0</i>     | <i>Ag</i> | <i>T0</i>     | <i>Ag</i> | <i>T0</i>     | <i>Ag</i> |      |
| <b>CD8+</b>              | <b>EGFRVIII</b> |                 | 34,7      |               | 30,8      |               | 25,3      |               | 34,9      |               | 16        |      |
|                          | <b>NY-ESO-1</b> | 18,2            | 33,9      | 19,6          | 9,63      | 39,6          | 33,2      | 20,1          | 25,5      | 9,55          | 13,2      |      |
|                          | <b>Survivin</b> |                 | 36,2      |               | 11,1      |               | 45        |               | 22,2      |               | 15,1      |      |
|                          | <b>4-1BB+</b>   | <b>EGFRVIII</b> |           | 0,78          |           | 0,49          |           | 0,47          |           | 0,96          |           | 1,93 |
|                          |                 | <b>NY-ESO-1</b> | 1,64      | 13,3          | 1,16      | 24,8          | 0,66      | 12,5          | 0,067     | 7,57          | 0,17      | 10,6 |
|                          |                 | <b>Survivin</b> |           | 12,4          |           | 25,2          |           | 11            |           | 16,2          |           | 11,6 |
|                          | <b>CD25+</b>    | <b>EGFRVIII</b> |           | 59,3          |           | 44,1          |           | 25,8          |           | 90,1          |           | 86,9 |
|                          |                 | <b>NY-ESO-1</b> | 5,58      | 43            | 5,98      | 97,6          | 1,59      | 65,2          | 3,47      | 50,9          | 1,4       | 96   |
|                          |                 | <b>Survivin</b> |           | 45,4          |           | 94,6          |           | 44,4          |           | 65            |           | 94,4 |
|                          | <b>CD127+</b>   | <b>EGFRVIII</b> |           | 32,6          |           | 30            |           | 43,6          |           | 15,6          |           | 21,6 |
|                          |                 | <b>NY-ESO-1</b> | 68,8      | 47,6          | 62,7      | 57,1          | 67,4      | 49,4          | 42,5      | 37            | 52,6      | 12,1 |
|                          |                 | <b>Survivin</b> |           | 42,9          |           | 53,1          |           | 57,1          |           | 37,1          |           | 19,6 |
|                          | <b>CTLA-4+</b>  | <b>EGFRVIII</b> |           | 1,17          |           | 1,48          |           | 1,62          |           | 8,46          |           | 24,2 |
|                          |                 | <b>NY-ESO-1</b> | 1,32      | 3,58          | 2,16      | 8,89          | 1,37      | 2,08          | 12        | 19,4          | 14,3      | 15,6 |
|                          |                 | <b>Survivin</b> |           | 2,91          |           | 7,09          |           | 2,91          |           | 18,3          |           | 28   |
|                          | <b>LAG3+</b>    | <b>EGFRVIII</b> |           | 92,3          |           | 94,5          |           | 96,1          |           | 12,6          |           | 26,2 |
|                          |                 | <b>NY-ESO-1</b> | 79        | 94,5          | 88,3      | 93,1          | 91,9      | 98,3          | 15,9      | 25,6          | 18,9      | 14,3 |
|                          |                 | <b>Survivin</b> |           | 95,5          |           | 94,6          |           | 98,1          |           | 26,5          |           | 24,6 |
|                          | <b>PD-1</b>     | <b>EGFRVIII</b> |           | 18,2          |           | 39,5          |           | 14,4          |           | 21,4          |           | 56,5 |
|                          |                 | <b>NY-ESO-1</b> | 7,53      | 28,3          | 26,3      | 44            | 4,63      | 18,2          | 6,04      | 26,4          | 5,34      | 80,4 |
|                          |                 | <b>Survivin</b> |           | 29,4          |           | 41,9          |           | 12,8          |           | 37            |           | 82,7 |
|                          | <b>TIM3+</b>    | <b>EGFRVIII</b> |           | 0,21          |           | 0,11          |           | 0,15          |           | 0,69          |           | 2,93 |
|                          |                 | <b>NY-ESO-1</b> | 0         | 0,061         | 0,016     | 0,11          | 7E-03     | 0,27          | 0,12      | 1,72          | 0,13      | 1,2  |
|                          |                 | <b>Survivin</b> |           | 0,19          |           | 0,2           |           | 1,75          |           | 4,13          |           | 3,96 |

| <i>Activation marker</i> |                       | <b>GBM 30</b>   |           | <b>GBM 31</b> |           | <b>GBM 33</b> |           | <b>GBM 34</b> |           | <b>GBM 35</b> |           |      |
|--------------------------|-----------------------|-----------------|-----------|---------------|-----------|---------------|-----------|---------------|-----------|---------------|-----------|------|
|                          | <i>Ag stimulation</i> | <i>T0</i>       | <i>Ag</i> | <i>T0</i>     | <i>Ag</i> | <i>T0</i>     | <i>Ag</i> | <i>T0</i>     | <i>Ag</i> | <i>T0</i>     | <i>Ag</i> |      |
| <b>CD4-<br/>CD8-</b>     | <b>EGFRVIII</b>       |                 | 52,5      |               | 28,7      |               | 63,6      |               | 16,6      |               | 6,28      |      |
|                          | <b>NY-ESO-1</b>       | 40,7            | 30,1      | 9,01          | 23        | 23,7          | 32,6      | 28,8          | 7,34      | 23,8          | 9,94      |      |
|                          | <b>Survivin</b>       |                 | 33,4      |               | 10,9      |               | 17,4      |               | 9,33      |               | 10,3      |      |
|                          | <b>4-1BB+</b>         | <b>EGFRVIII</b> |           | 0,83          |           | 0,87          |           | 0,52          |           | 1,17          |           | 1,92 |
|                          |                       | <b>NY-ESO-1</b> | 0,25      | 13,5          | 0,68      | 26,4          | 0,099     | 15,9          | 0,18      | 12,6          | 0,067     | 9,42 |
|                          |                       | <b>Survivin</b> |           | 17,8          |           | 19,8          |           | 11,3          |           | 17,4          |           | 10,1 |
|                          | <b>CD25+</b>          | <b>EGFRVIII</b> |           | 25,4          |           | 15,8          |           | 14,7          |           | 78,4          |           | 56,9 |
|                          |                       | <b>NY-ESO-1</b> | 24,8      | 15,8          | 7,93      | 70,7          | 0,41      | 35,4          | 1,28      | 24            | 0,27      | 71,4 |
|                          |                       | <b>Survivin</b> |           | 17,1          |           | 56,8          |           | 18            |           | 31,9          |           | 64   |
|                          | <b>CD127+</b>         | <b>EGFRVIII</b> |           | 17,7          |           | 20,8          |           | 13,9          |           | 2,31          |           | 4,75 |
|                          |                       | <b>NY-ESO-1</b> | 27,2      | 35,5          | 41,4      | 36,3          | 39,9      | 25,9          | 6,37      | 13,8          | 13,1      | 3,48 |
|                          |                       | <b>Survivin</b> |           | 35,6          |           | 46,3          |           | 49,4          |           | 14            |           | 5,71 |
|                          | <b>CTLA-4+</b>        | <b>EGFRVIII</b> |           | 0,41          |           | 1,53          |           | 0,75          |           | 1,66          |           | 13,6 |
|                          |                       | <b>NY-ESO-1</b> | 0,69      | 1,97          | 3,43      | 4,84          | 0,87      | 1,3           | 2,77      | 4,03          | 2,9       | 12,6 |
|                          |                       | <b>Survivin</b> |           | 1,92          |           | 4,94          |           | 1,29          |           | 5,16          |           | 24,3 |
|                          | <b>LAG3+</b>          | <b>EGFRVIII</b> |           | 10,5          |           | 12,7          |           | 13,9          |           | 2,35          |           | 5,63 |
|                          |                       | <b>NY-ESO-1</b> | 6,05      | 21,1          | 23,8      | 28,9          | 25,6      | 21,4          | 6,1       | 7,08          | 8,16      | 3,07 |
|                          |                       | <b>Survivin</b> |           | 20,6          |           | 28,7          |           | 15,4          |           | 7,44          |           | 6,05 |
|                          | <b>PD-1</b>           | <b>EGFRVIII</b> |           | 18,9          |           | 10,9          |           | 16,6          |           | 8,79          |           | 51,1 |
|                          |                       | <b>NY-ESO-1</b> | 4,14      | 17,4          | 15,6      | 16,8          | 6,43      | 14,2          | 1,29      | 10,4          | 3,77      | 52,7 |
|                          |                       | <b>Survivin</b> |           | 17,6          |           | 22,1          |           | 7,32          |           | 14,2          |           | 52,2 |
|                          | <b>TIM3+</b>          | <b>EGFRVIII</b> |           | 0,12          |           | 0,062         |           | 0,16          |           | 0,66          |           | 1,92 |
|                          |                       | <b>NY-ESO-1</b> | 0         | 0,17          | 0         | 0,28          | 0         | 0,18          | 0,07      | 1,39          | 0,067     | 0,9  |
|                          |                       | <b>Survivin</b> |           | 0,33          |           | 0,1           |           | 0,29          |           | 2,76          |           | 2,58 |

PBMCs from five patients with glioblastoma were expanded in IL-2, IL-15 and IL-21 as described in the material and method section using i) the cytokine cocktail alone (medium control), ii) the cytokine cocktail plus the respective stimulating antigen (EGFRVIII, NY-ESO-1 or

Survivin). T0= time point zero, start of the T-cell expansion; TH= time of T-cell harvest. The numbers at T0 represent the number of CD4+ within CD3+ T-cells (A), CD8+ (B), or DN (CD4-CD8-) T-cells within CD3+ T-cells (C, numbers are in blue). Different numbers of CD4+, CD8+ and DN (CD4-CD8-) CD3+ T-cells associated with the stimulating antigen. A panel of activation markers was tested and the frequency of activation marker positive T-cells within the respective T-cell population (CD4, CD8 or DN) is reported at time point zero and at the time point of harvest. Numbers represent the frequency of activation marker-positive T-cells in the respective CD4+, CD8+ or DN (CD4-CD8-) CD3+ T-cell population. The values of marker-positive T-cells from the cytokine alone (medium control) have been subtracted. Note the patient-to-patient difference and differences in marker-positive T-cells is associated with the nature of the stimulating antigen, e.g. the difference of 4-1BB positive T-cells in CD4+, CD8+ or DN+ T-cells.

**Supplementary Table 4:** NY-ESO-1-driven expansion of PBMCs from patients with NY-ESO-1+ glioma

|        |                       |              | PMA    |       | NY-ESO-1 |       |
|--------|-----------------------|--------------|--------|-------|----------|-------|
|        |                       |              | Before | After | Before   | After |
| GBM 30 | CD3+/<br>CD4+         | IFN $\gamma$ | 6,29   | 2,02  | 0,02     | 0,00  |
| GBM 31 |                       | IFN $\gamma$ | 16,56  | 1,71  | 0,00     | 0,27  |
| GBM 35 |                       | IFN $\gamma$ | 1,13   | 2,56  | 0,00     | 0,03  |
|        |                       |              |        |       |          |       |
| GBM 30 |                       | IL-2         | 43,39  | 10,44 | 0,11     | 0,00  |
| GBM 31 |                       | IL-2         | 21,19  | 13,26 | 0,00     | 2,11  |
| GBM 35 |                       | IL-2         | 15,34  | 58,78 | 0,01     | 0,00  |
|        |                       |              |        |       |          |       |
| GBM 30 |                       | TNF $\alpha$ | 37,47  | 10,99 | 0,48     | 0,58  |
| GBM 31 | TNF $\alpha$          | 36,06        | 8,24   | 1,04  | 0,67     |       |
| GBM 35 | TNF $\alpha$          | 19,54        | 53,22  | 0,00  | 0,46     |       |
| GBM 30 | CD3+/<br>CD8+         | IFN $\gamma$ | 62,35  | 49,70 | 0,29     | 0,84  |
| GBM 31 |                       | IFN $\gamma$ | 72,56  | 56,57 | 0,00     | 1,50  |
| GBM 35 |                       | IFN $\gamma$ | 13,61  | 41,64 | 0,18     | 0,76  |
|        |                       |              |        |       |          |       |
| GBM 30 |                       | IL-2         | 10,80  | 21,79 | 0,18     | 0,00  |
| GBM 31 |                       | IL-2         | 13,08  | 13,51 | 0,00     | 3,36  |
| GBM 35 |                       | IL-2         | 8,16   | 31,27 | 0,01     | 0,00  |
|        |                       |              |        |       |          |       |
| GBM 30 |                       | TNF $\alpha$ | 74,11  | 60,01 | 0,96     | 3,11  |
| GBM 31 | TNF $\alpha$          | 78,82        | 65,47  | 2,85  | 0,00     |       |
| GBM 35 | TNF $\alpha$          | 16,75        | 58,78  | 0,00  | 1,44     |       |
| GBM 30 | CD3+/<br>CD4-<br>CD8- | IFN $\gamma$ | 8,83   | 3,17  | 0,05     | 0,00  |
| GBM 31 |                       | IFN $\gamma$ | 7,36   | 4,95  | 0,01     | 0,34  |
| GBM 35 |                       | IFN $\gamma$ | 4,77   | 13,48 | 0,01     | 0,21  |
|        |                       |              |        |       |          |       |
| GBM 30 |                       | IL-2         | 5,17   | 0,52  | 0,09     | 0,00  |
| GBM 31 |                       | IL-2         | 3,41   | 2,99  | 0,00     | 1,36  |
| GBM 35 |                       | IL-2         | 1,40   | 22,45 | 0,00     | 0,24  |
|        |                       |              |        |       |          |       |
| GBM 30 |                       | TNF $\alpha$ | 35,86  | 5,40  | 0,24     | 0,12  |
| GBM 31 | TNF $\alpha$          | 22,96        | 8,07   | 2,35  | 0,25     |       |
| GBM 35 | TNF $\alpha$          | 9,56         | 37,01  | 0,00  | 0,89     |       |

Intracellular cytokine staining: Before/after NY-ESO-1 peptide stimulation of PBMCs from patients with glioblastoma, medium values (i.e. T-cells cultured in cytokines IL-2, IL-15 and IL-21, yet without stimulating peptide targets) are already subtracted in the NY-ESO-1 antigen responses.

**Supplementary Table 5:** Cytokine production of NY-ESO-1 stimulated PBMCs from a Healthy Donor

| <b>T cell Subgroup</b> | <b>Cytokine Production</b>     | <b>T0</b>   | <b>TH</b>   |
|------------------------|--------------------------------|-------------|-------------|
| <b>CD3+CD8+</b>        | <b>IFN-<math>\gamma</math></b> | <b>0.01</b> | <b>0.18</b> |
|                        | <b>TNF-<math>\alpha</math></b> | <b>0.23</b> | <b>0.12</b> |
|                        | <b>IL-2</b>                    | <b>0.00</b> | <b>0.03</b> |
| <b>CD3+CD4+</b>        | <b>IFN-<math>\gamma</math></b> | <b>0.07</b> | <b>0.07</b> |
|                        | <b>TNF-<math>\alpha</math></b> | <b>0.03</b> | <b>0.83</b> |
|                        | <b>IL-2</b>                    | <b>0.00</b> | <b>0.77</b> |
| <b>CD3+CD4-CD8-</b>    | <b>IFN-<math>\gamma</math></b> | <b>0.00</b> | <b>0.11</b> |
|                        | <b>TNF-<math>\alpha</math></b> | <b>0.17</b> | <b>0.43</b> |
|                        | <b>IL-2</b>                    | <b>0.00</b> | <b>1.17</b> |

PBMCs from HLA-A2+ healthy donors were expanded in IL-2, IL-15 and IL-21 and stimulated with the TAA NY-ESO-1 as described in the material and method section. T0= time point zero, start of the T-cell expansion; TH= time of T-cell harvest. Cytokines were measured after intracellular cytokine staining by flow cytometry. A panel of cytokines (IFN- $\gamma$ , TNF- $\alpha$  and IL-2) were tested and the frequency of cytokine producing T-cells within the respective T-cell population (CD4, CD8 or DN) is reported at time point zero and at the time point of harvest. Numbers represent the frequency of cytokine producing T-cells in the respective CD4+, CD8+ or DN (CD4-CD8-) CD3+ T-cell population. Note that NY-ESO-1 reactive T-cells can be expanded from individuals without cancer, which reflects the fact that NY-ESO-1 reactive T-cell clones exist in the TCR repertoire in PBMCs from healthy individuals.



x20

x40

Magnification

**Testis**

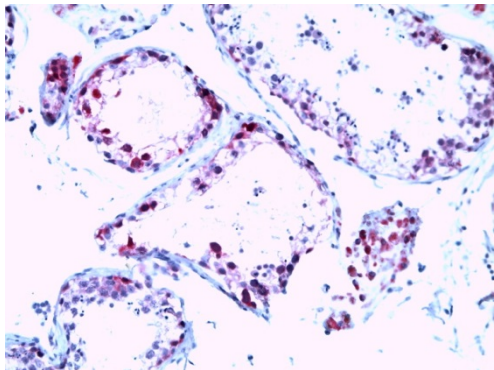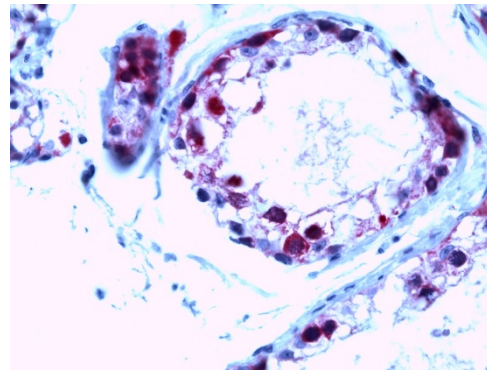

**Positive control**

Anti-NY-ESO-1 Ab +  
secondary Ab

**Glioma**

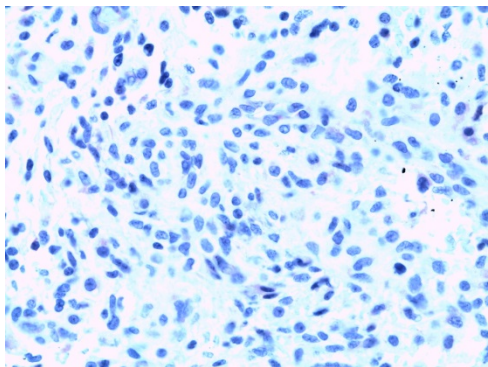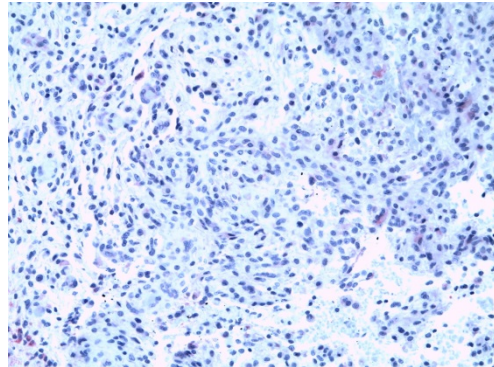

**Negative control**

no anti-NY-ESO-1 Ab +  
secondary Ab

**Testis**

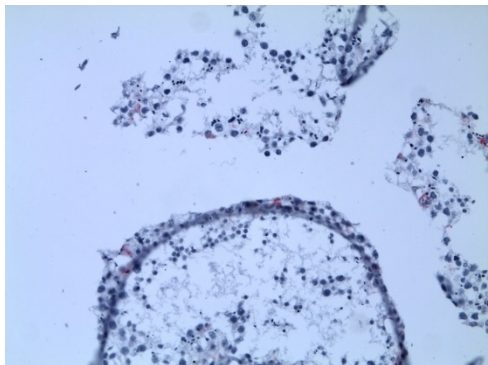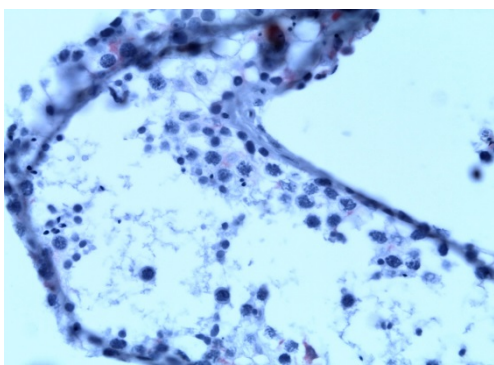

**Negative control**

no anti-NY-ESO-1 Ab +  
secondary Ab

Immunohistochemistry of NY-ESO-1. Testis tissue staining served as positive control. For negative controls, testis tissue as well as glioblastoma sections were stained only with the secondary antibody.

# Supplementary Figure 1b

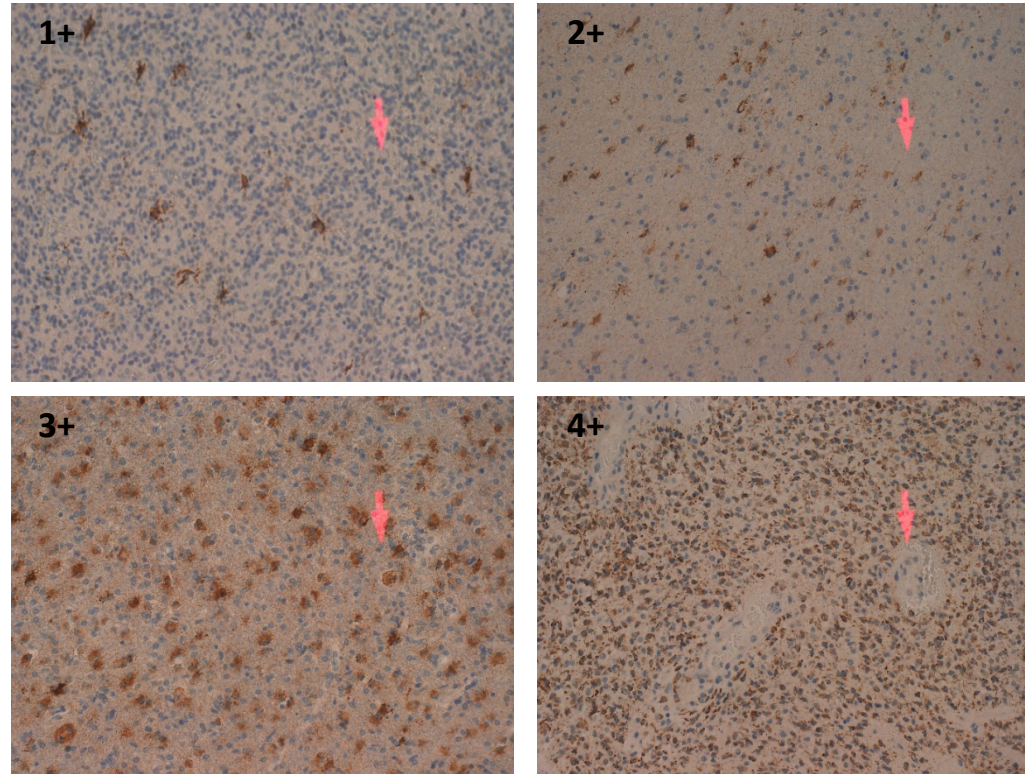

| Score | Survivin positive |
|-------|-------------------|
| 1+    | < 10%             |
| 2+    | 10-20%            |
| 3+    | 20-50%            |
| 4+    | > 50%             |

Immunohistochemistry of survivin. The percentage of positive cells was evaluated using a semi-quantitative score: 1+ <10%, score 2+ = 10-20%, score 3+ = 20-50% and score 4+ >50%.

Supplementary Figure 2a

IFN $\gamma$  production (top) and proliferation ratio (bottom) after 7 day expansion of patients' peripheral blood lymphocytes with positive controls (PHA, or the viral target EBNA-3) and a negative control (medium only); 3 different culture conditions: i) without cytokines (RPMI only), ii) with a IL-7/IL-2 cytokine cocktail, or iii) with a IL-2/IL-15/IL-21 cytokine cocktail (\* p  $\leq$  0,05, \*\* p  $\leq$  0,001).  
 Data shown after subtraction of the constitutive IFN $\gamma$  production.

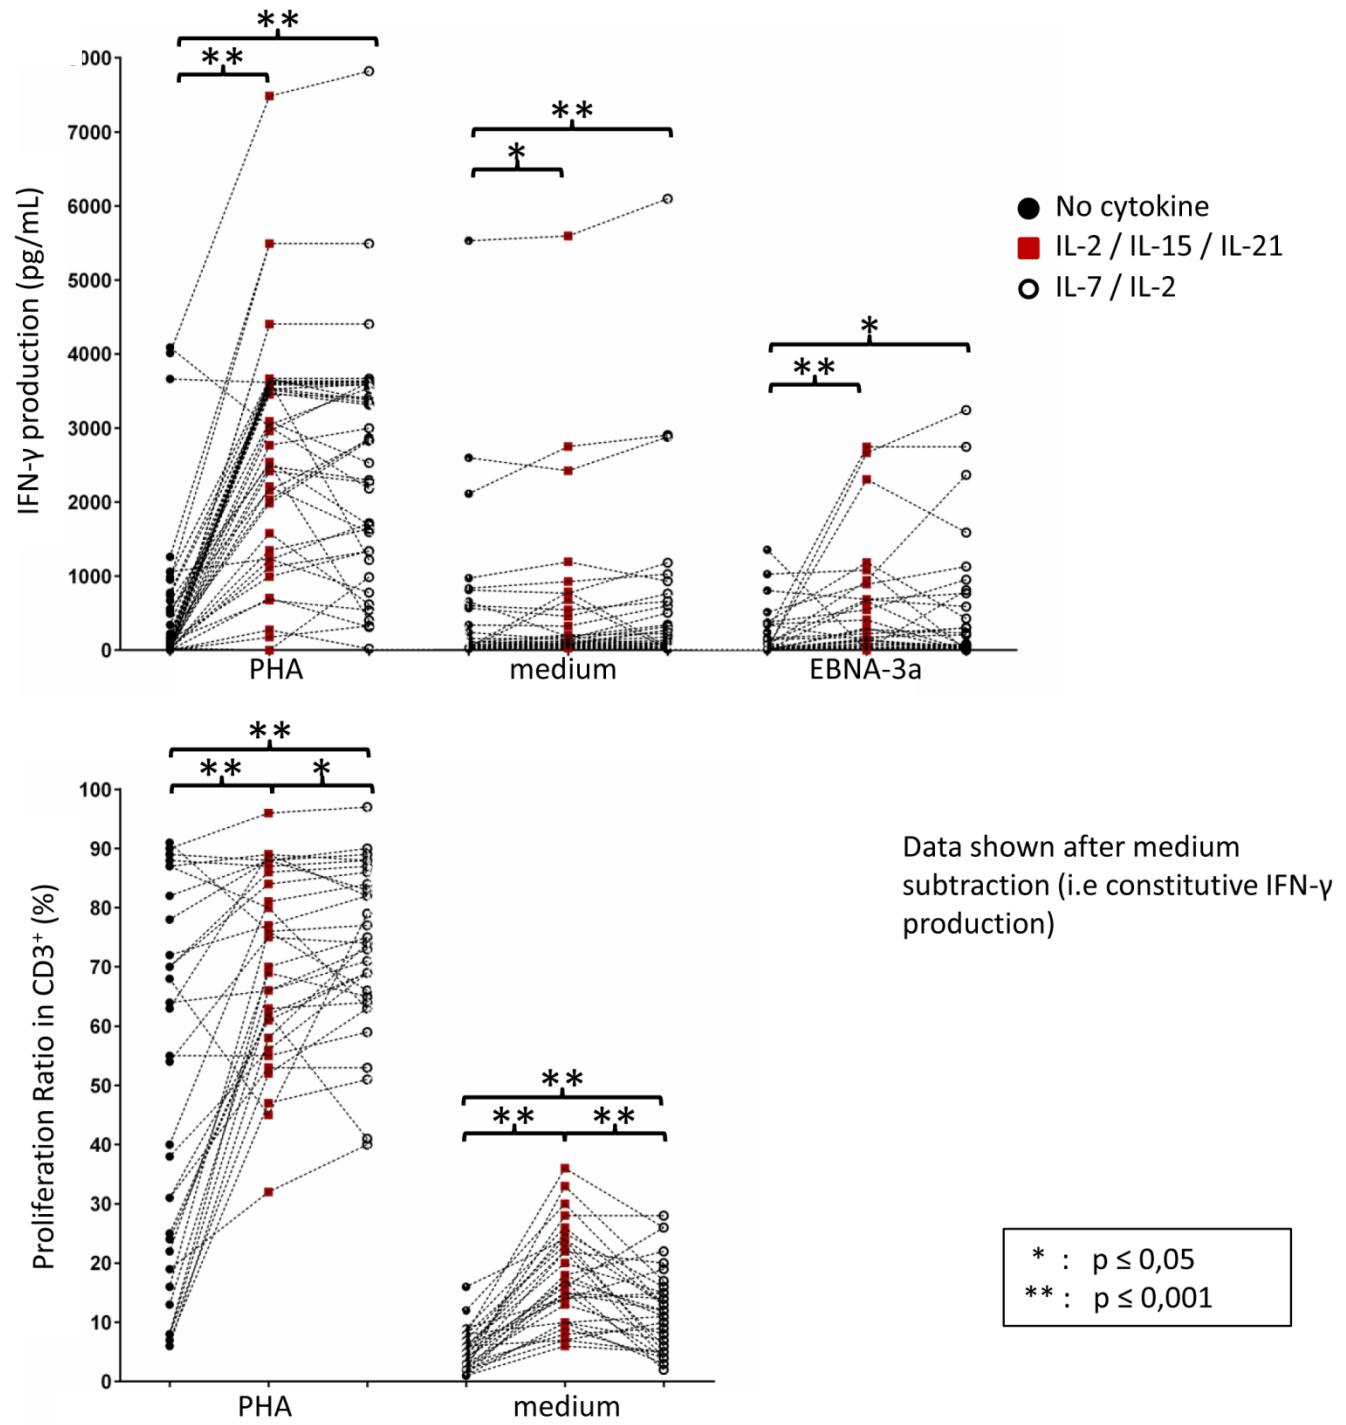



Supplementary Figure 2b

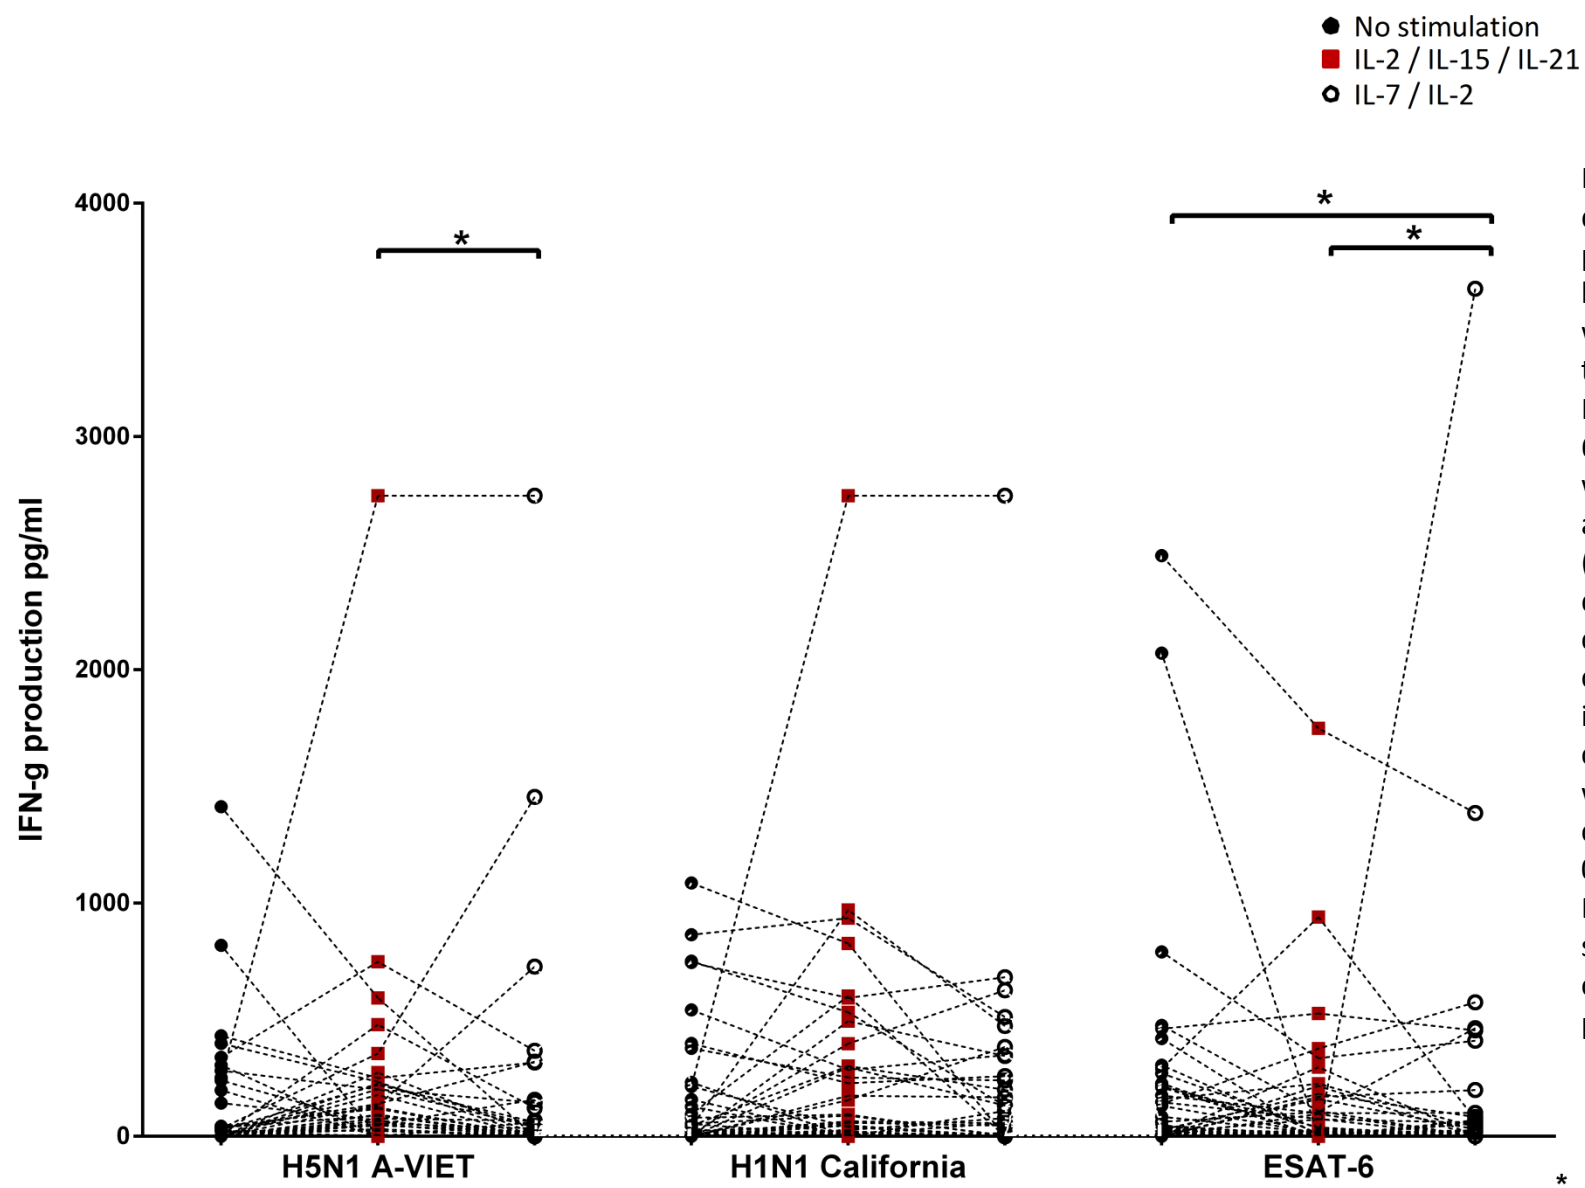

IFN $\gamma$  production after 7 day expansion of patients' peripheral blood lymphocytes with controls (the viral target H1N1 California, H5N1 A-VIET or ESAT-6, antigen associated with M. tuberculosis) and a negative control (medium only); 3 different culture conditions: i) without cytokines (RPMI only), ii) with a IL-7/IL-2 cytokine cocktail, or iii) with a IL-2/IL-15/IL-21 cytokine cocktail (\* p  $\leq$  0,05, \*\* p  $\leq$  0,001). Data shown after subtraction of the constitutive IFN $\gamma$  production.

\* P<0.05  
\*\* P<0.001

Supplementary Figure 3

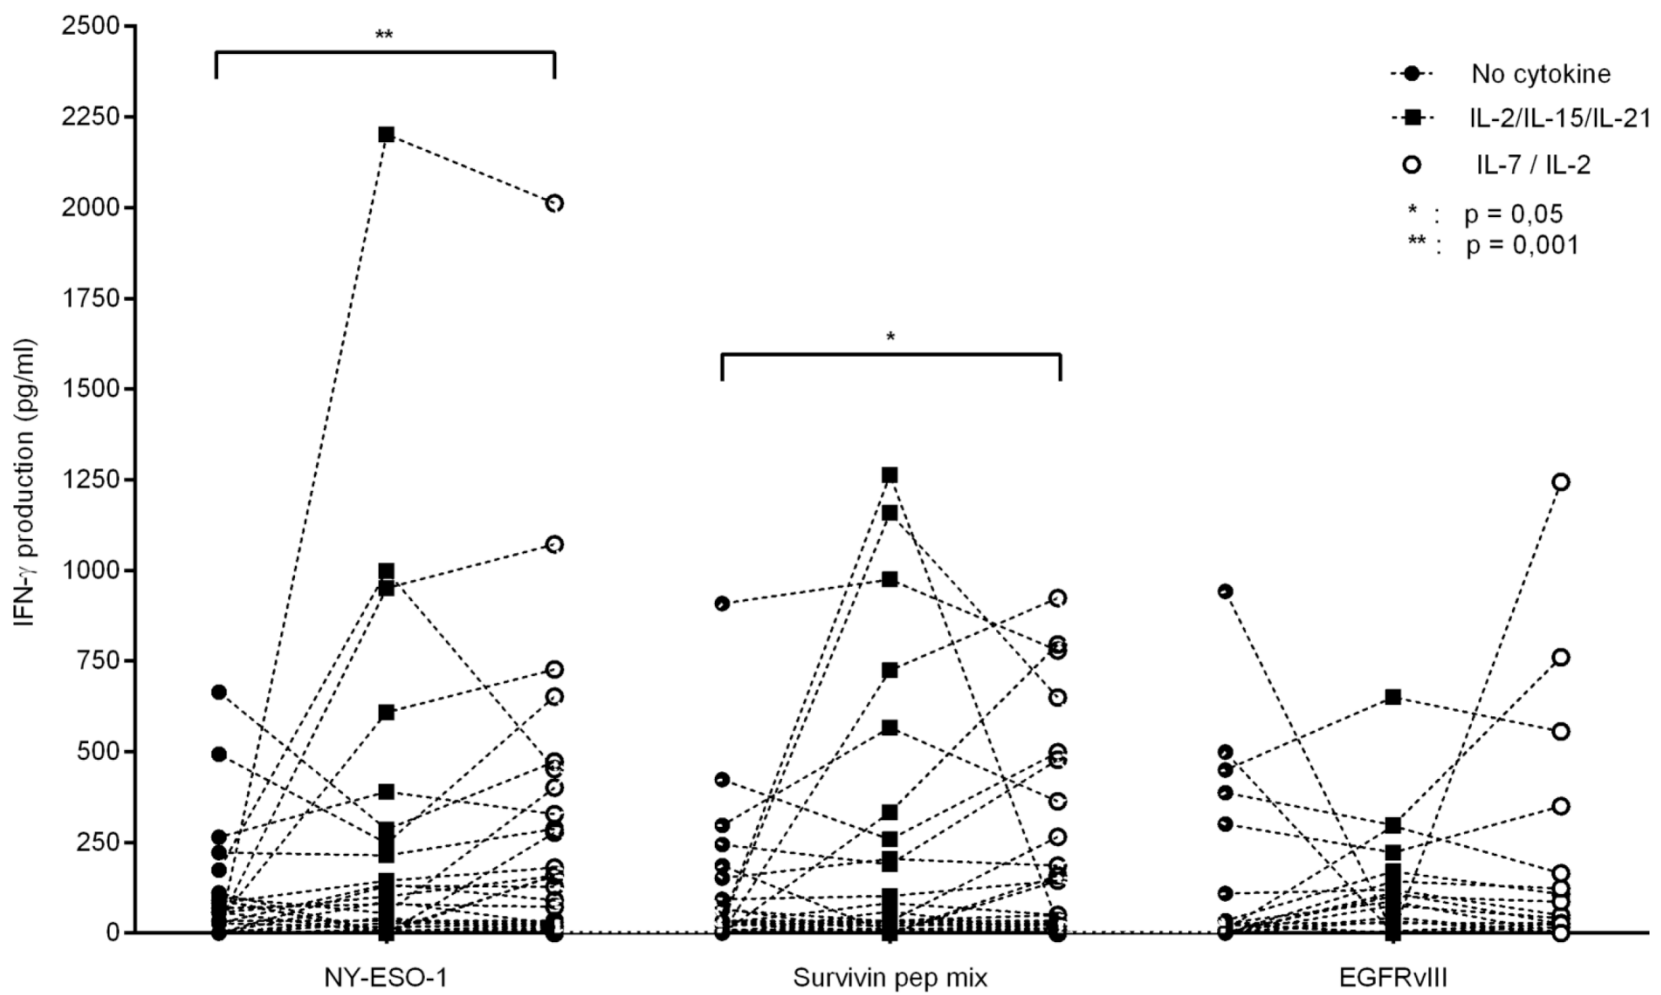

IFN $\gamma$  production after a 7 day expansion of peripheral blood with NY-ESO-1, the survivin peptide mix or the EGFRVIII antigen; 3 different conditions: i) without cytokines (RPMI only), ii) with a IL-7/IL-2 cytokine cocktail, or iii) with a IL-2/IL-15/IL-21 cytokine cocktail (\*  $p \leq 0,05$ , \*\*  $p \leq 0,001$ ). Data shown after subtraction of the constitutive IFN $\gamma$  production.

Supplementary Figure 4

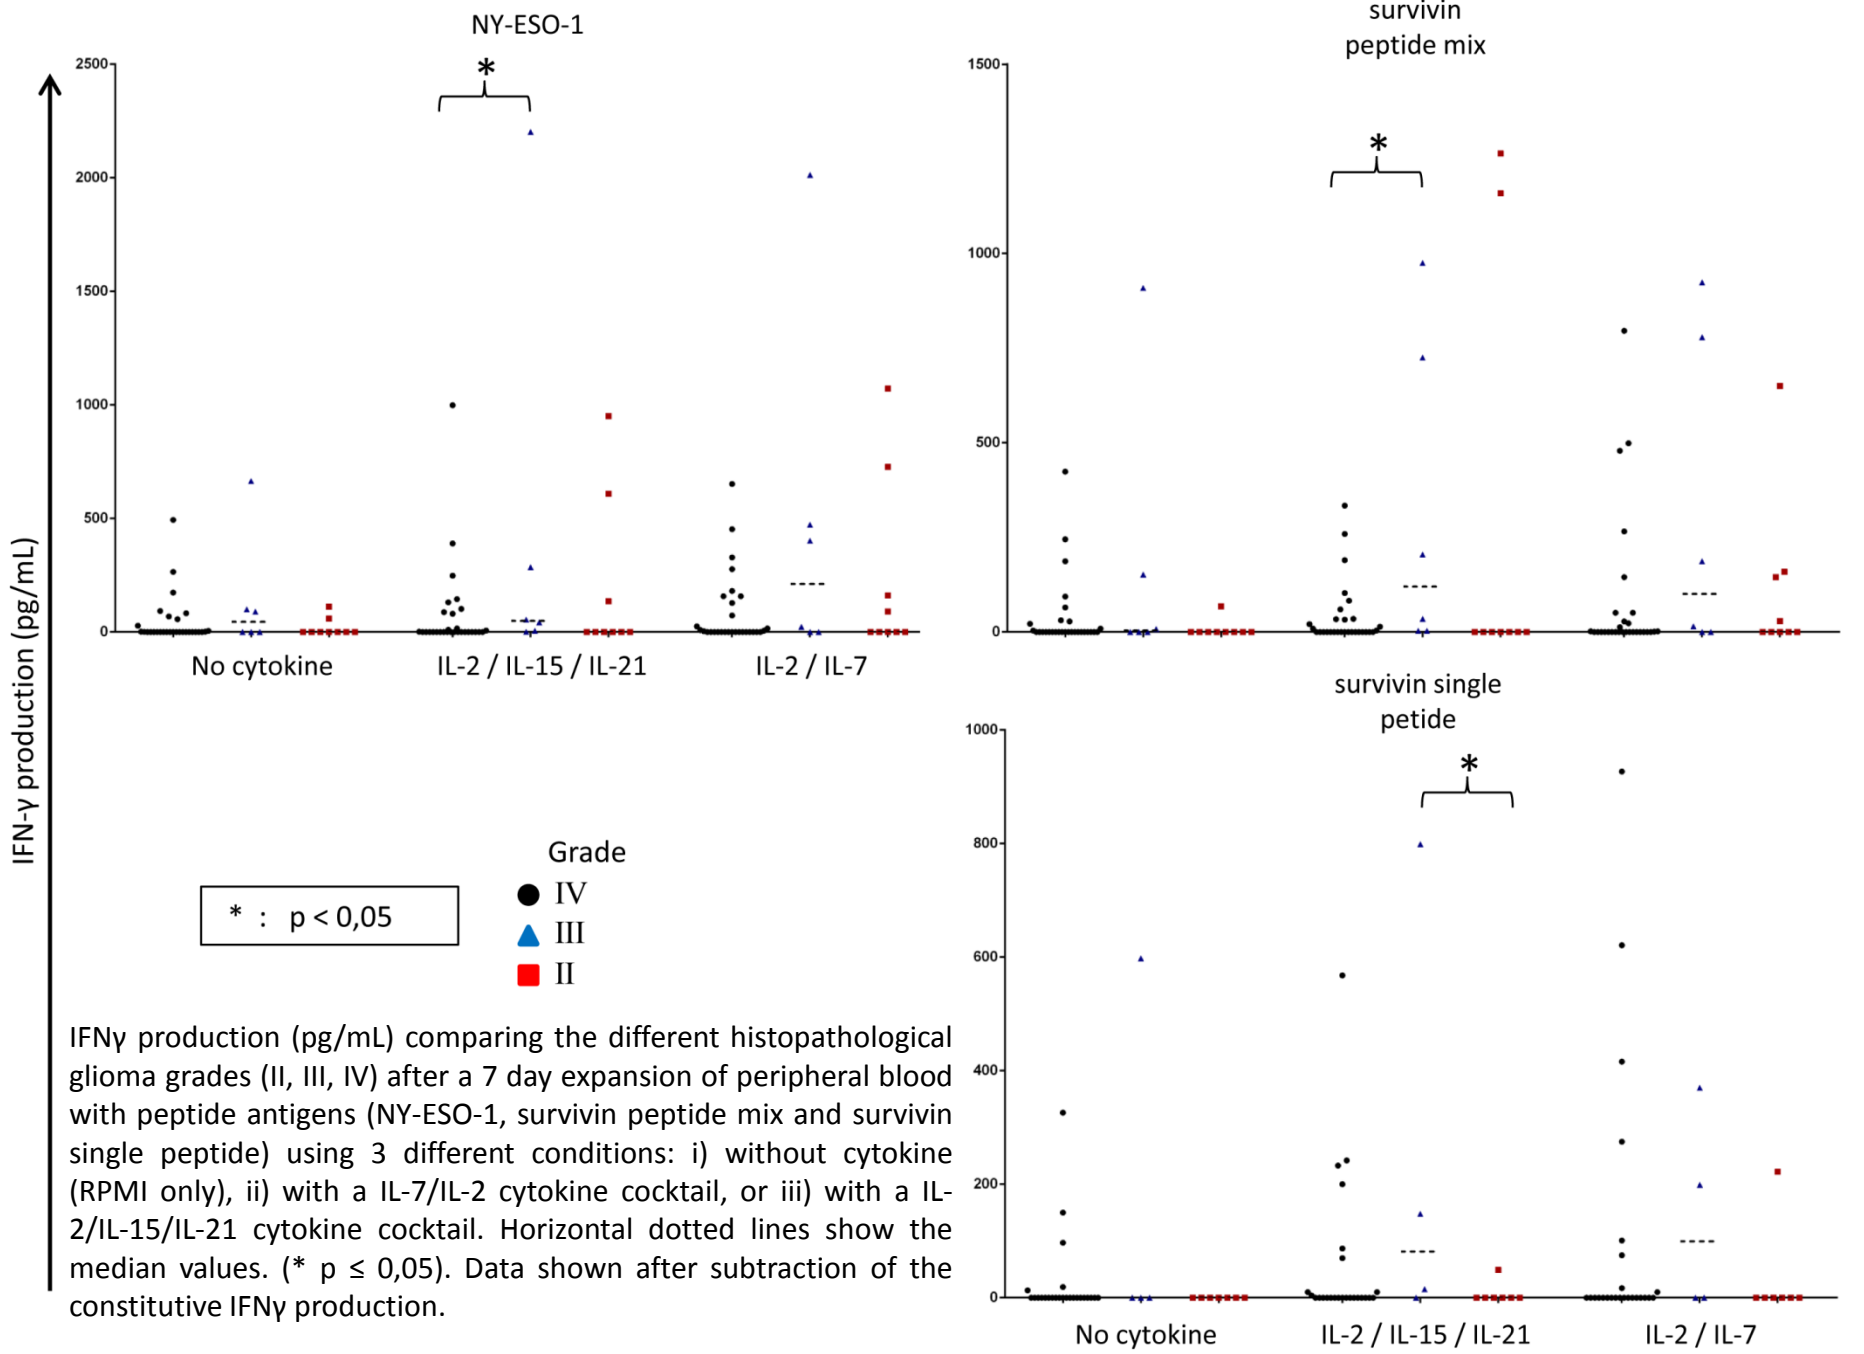

Supplementary Figure 5

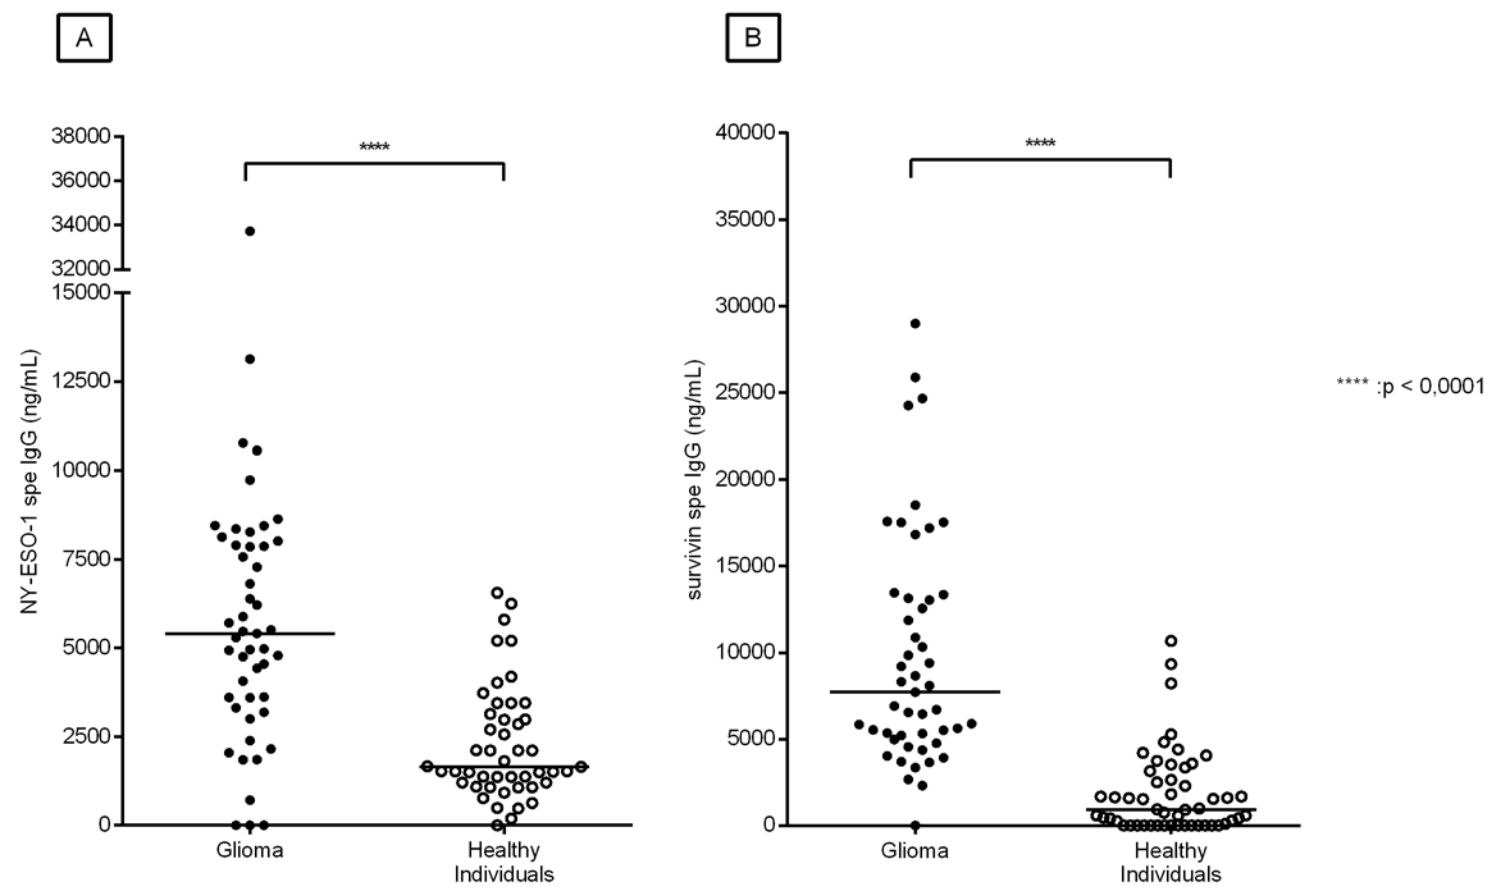

Anti-NY-ESO-1 (A) and anti-survivin (B) plasma humoral immune response from patients with glioma and age and gender-matched healthy individuals (\*\*\*\* p < 0,0001). Medians are indicated. Strong IgG responses in plasma from patients with glioma directed against TAAs.

Supplementary Figure 6

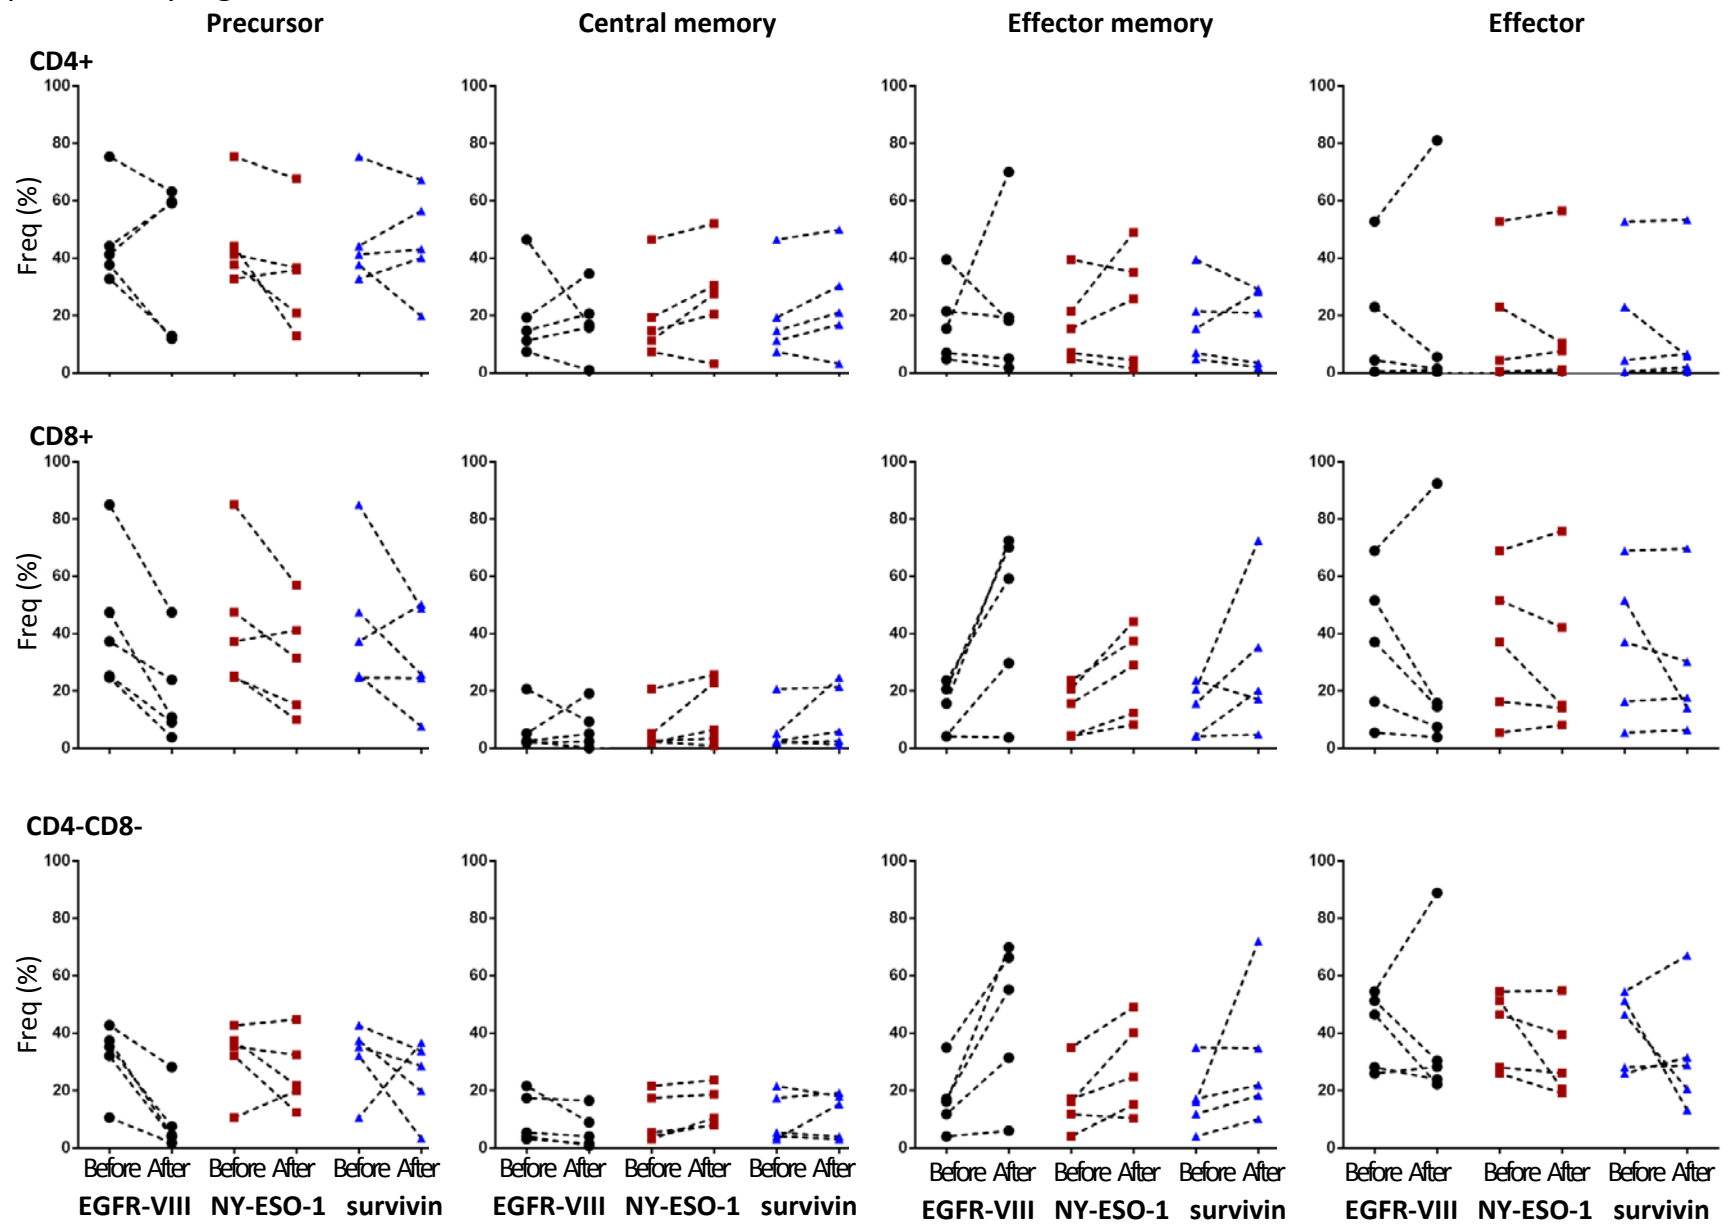

PBMCs from patients with GBM were expanded using the IL-2, IL-15 and IL-21 cytokine cocktail and NY-ESO-1 peptides as described in the material and methods section. Before: time point prior to culture initiation; After = Time of harvest, i.e. day 18. PBMCs gated on CD3+ T-cells, then on CD4+ or CD8+ T-cells and analyzed for CD45RA and CCR7 marker expression. Note the frequency of precursor CD45RA+CCR7+ T-cells. Numbers represent frequency of T-cells in the respective parental population.



### 4-1BB expression increased after expansion with NY-ESO-1

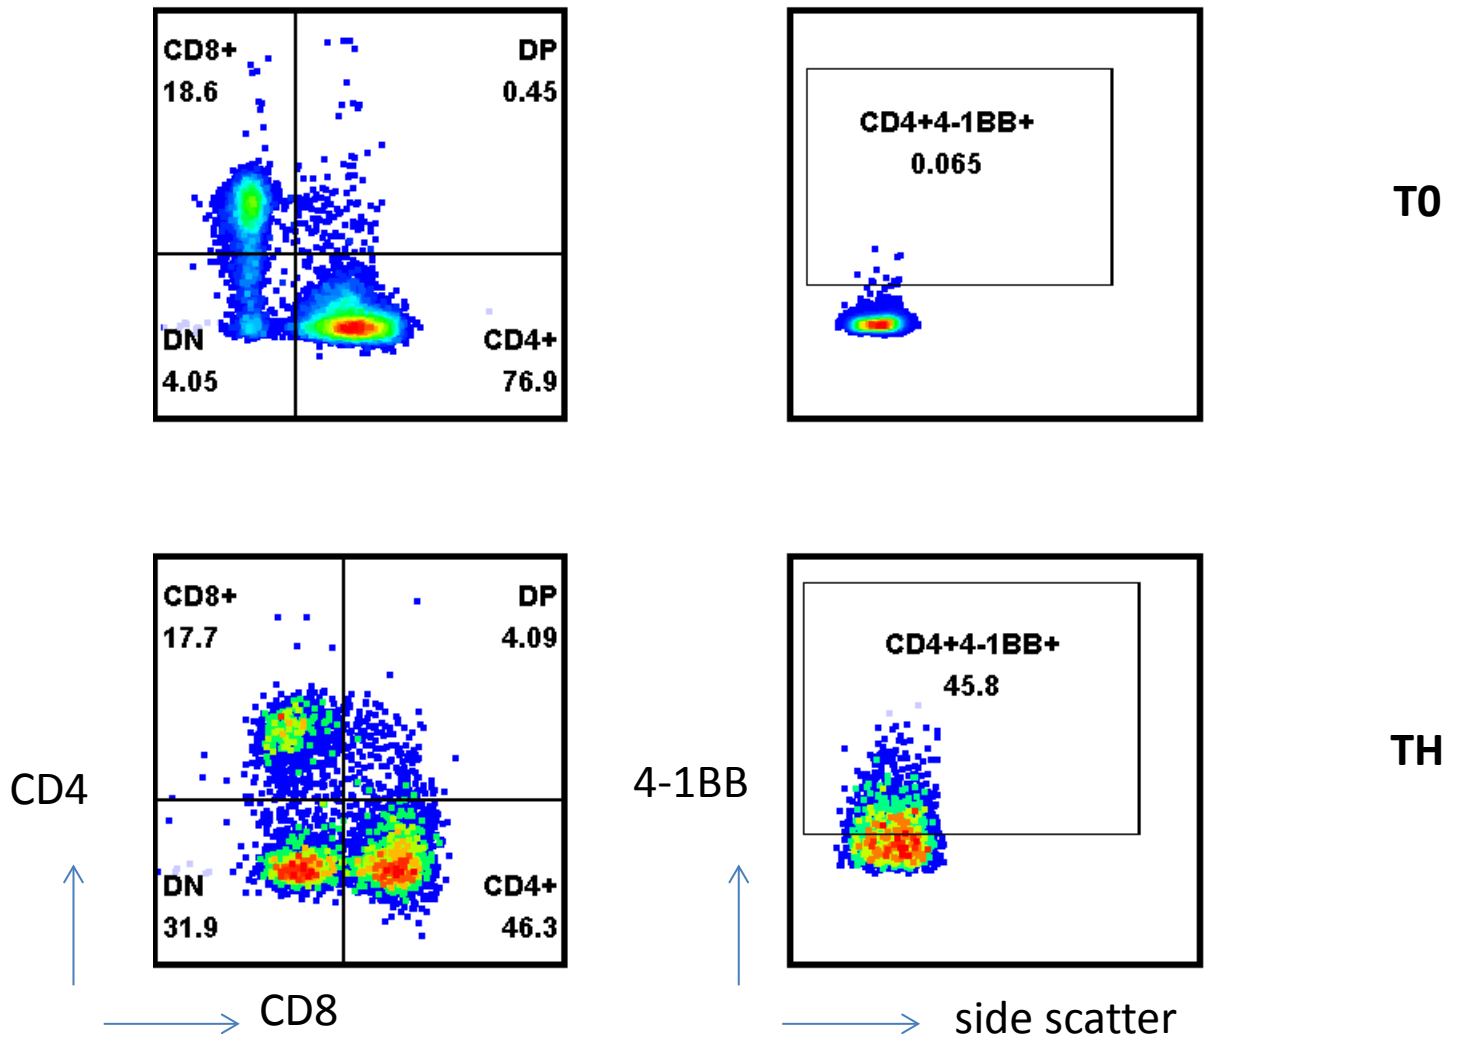

30 million cells from a patient with GBM were expanded using the IL-2, IL-15 and IL-21 cytokine cocktail and NY-ESO-1 peptides as described in the material and methods section. T0= time point prior to culture initiation; TH= Time of harvest, i.e. day 18. Top panel: PBMCs gated on CD3+CD4+ T-cells analyzed for 4-1BB expression. Bottom panel: T-cells were gated on CD3+ CD4+ T-cells and the frequency of 4-1BB+ T-cells were determined. Numbers represent frequency of T-cells in the respective parental population. Frequency of 4-1BB + T-cells in CD3+CD4+ T-cells; side scatter versus 4-1BB marker expression.

Supplementary Figure 8

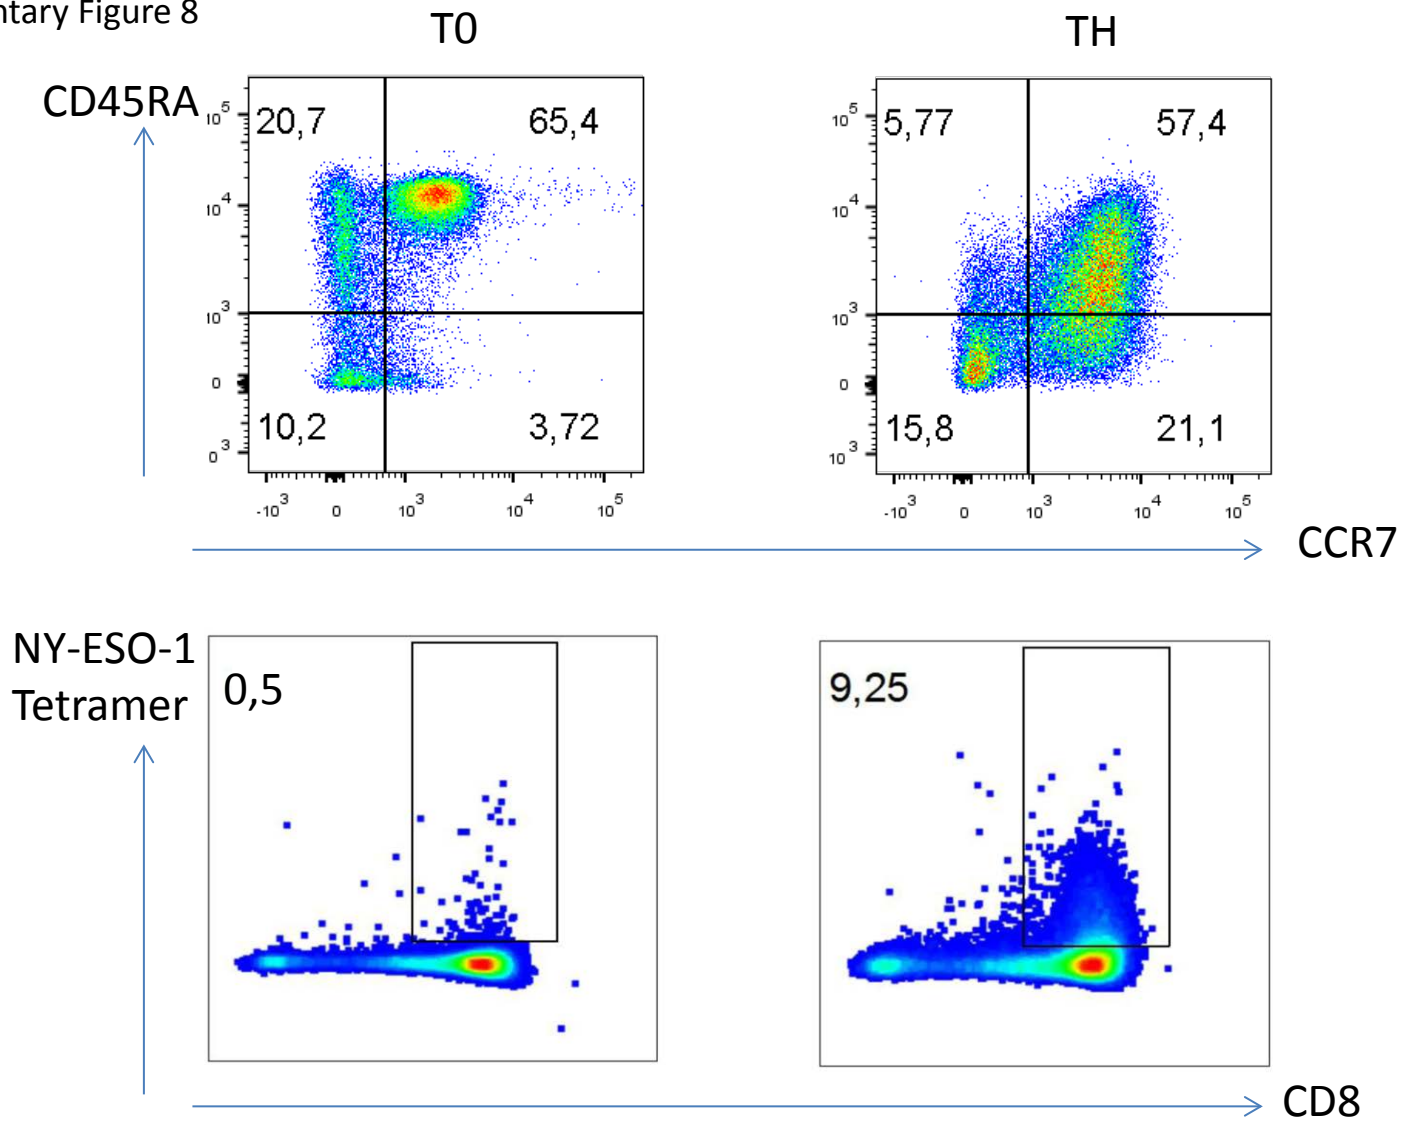

30 million cells from an HLA-A\*02:01+ patients with GBM were expanded using the IL-2, IL-15 and IL-21 cytokine cocktail and NY-ESO-1 peptides as described in the material and methods section. T0= time point prior to culture initiation; TH= Time of harvest, i.e. day 18. Top panel: PBMCs gated on CD3+CD8+ T-cells analyzed for CD45RA and CCR7 marker expression. Note the frequency of precursor CD45RA+CCR7+ T-cells. Bottom panel: T-cells were gated on CD3+ T-cells and tetramer – reative T-cells were tested at day 18. Left: negative tetramer, right: NY-ESO-1 tetramer; 1.25 NY-ESO-1 tetramer – positive T-cells at time point zero (data not shown). Numbers represent frequency of T-cells in the respective parental population.

Supplementary Figure 9

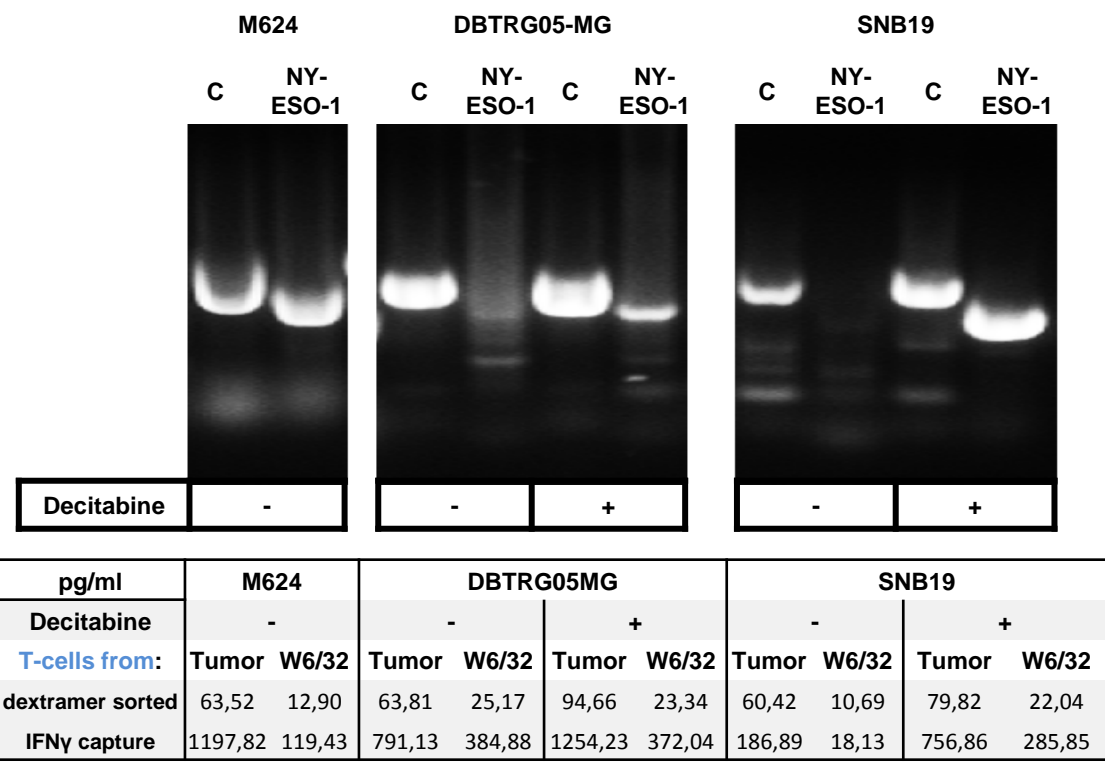

NY-ESO-1 expression in 3 different tumor cell lines: melanoma M624 and glioblastoma DTRG05-MG and SNB19 upon decitabine treatment (-/+). GADPH served as the positive control ( C ). IFN $\gamma$  production (%) from isolated NY-ESO-1 T-cells from two glioblastoma patients using dextramer sorting or a IFN $\gamma$  capture procedure after 3 days co-culture with the tumor cell lines M624, DTRG05-MG and SNB19 treated with (+) or without (-) decitabine. Tumor cells without T-cells or T-cells without tumor cells served as controls (data not shown). Anti-tumor reactivity could be blocked with the anti-MHC class I directed mAb W6/32. Numbers are pg/mL. Left columns represent cytokine production (tumor+ T-cells); right columns: anti-MHC class I blocking of T-cell anti-tumor reactivity.
